1 **Title: Dopaminergic learning and arousal circuits mediate opposing effects on**  
2 **alcohol consumption in *Drosophila*.**

3  
4  
5 **Authors:** Shamsideen A. Ojelade<sup>1,†</sup>, Andrew R. Butts<sup>2</sup>, Collin B. Merrill<sup>2</sup>, Eve Privman  
6 Champaloux<sup>3</sup>, Yoshinori Aso<sup>4</sup>, Danielle Wolin<sup>3</sup>, Roberto U. Cofresi<sup>5</sup>, Rueben A.  
7 Gonzales<sup>5</sup>, Gerald M. Rubin<sup>4</sup>, B. Jill Venton<sup>3</sup>, Aylin R. Rodan<sup>2,6,7</sup>, and Adrian  
8 Rothenfluh<sup>1,2,7,8,\*</sup>

9  
10  
11 **Affiliations:** <sup>1</sup>Department of Psychiatry, Program in Neuroscience, UT Southwestern  
12 Medical Center, Dallas, TX.

13 <sup>2</sup>Molecular Medicine Program, University of Utah, Salt Lake City, UT.

14 <sup>3</sup>Department of Chemistry, University of Virginia, Charlottesville, VA.

15 <sup>4</sup>Janelia Research Campus, HHMI, Ashburn, VA.

16 <sup>5</sup>Division of Pharmacology and Toxicology, College of Pharmacy, University of Texas at  
17 Austin, TX.

18 <sup>6</sup>Department of Internal Medicine, Division of Nephrology, University of Utah, Salt Lake  
19 City, UT.

20 <sup>7</sup>Department of Human Genetics, University of Utah, Salt Lake City, UT.

21 <sup>8</sup>Department of Psychiatry, Department of Neurobiology and Anatomy, University of  
22 Utah, Salt Lake City, UT.

23

24 \*Corresponding Author: E-mail: [Adrian.Rothenfluh@hsc.utah.edu](mailto:Adrian.Rothenfluh@hsc.utah.edu)

25

26 †Present Address: Department of Neurology, Department of Molecular and Human

27 Genetics, Baylor College of Medicine, Houston, TX

28

29 **ABSTRACT**

30

31 The response to drugs of abuse is a combination of aversive and reinforcing reactions.

32 While much is known about the role of dopamine in mammalian drug reinforcement, we

33 know little about the brain circuits mediating drug aversion. Here we show that two

34 distinct dopaminergic circuits mediate reinforcing and acute aversive responses to

35 alcohol consumption in *Drosophila*. Protocerebral anterior medial dopamine neurons

36 projecting to the mushroom bodies are required for flies to acquire alcohol preference.

37 Conversely, a bilateral pair of dopamine neurons projecting to the dorsal fan-shaped

38 body (dFSB) mediates acute alcohol avoidance. Alcohol consumption can be reduced

39 by decreasing the activity of the appetitive reinforcement-circuit to the mushroom bodies,

40 or by increasing activity in the dopamine neurons projecting to the dFSB. Thus, distinct

41 dopaminergic pathways can be targeted to reduce the intake of harmful drugs.

42

## 43 INTRODUCTION

44 Alcohol exposure causes both pleasurable and negative responses in humans.  
45 People displaying increased sensitivity to alcohol's rewarding effects or resistance to  
46 the acute aversive responses are at increased risk for alcohol use disorder (AUD)<sup>1</sup>. The  
47 development of AUD involves circuits mediating the reinforcing effects of alcohol,  
48 including dopaminergic projections from the ventral tegmental area to the nucleus  
49 accumbens<sup>2</sup>. However, much less is known about the neurons mediating the acute  
50 aversive responses to this drug.

51 Similar to mammals, *Drosophila* show naïve aversion to alcohol when given a  
52 choice between liquid food with or without alcohol<sup>3</sup>. This initial alcohol aversion  
53 transforms into experience-dependent preference after an alcohol pre-exposure<sup>3</sup>.  
54 Dopaminergic neurons are involved in the recall of ethanol-conditioned odor preference<sup>4</sup>.  
55 However, it is not known how dopamine is involved in voluntary ethanol consumption in  
56 *Drosophila*—including naïve aversion and the transformation from aversion to  
57 experience-dependent alcohol preference. Here we show that distinct dopamine  
58 circuits mediate the acute aversive and reinforcing effects upon ethanol exposure. We  
59 also show that normal ethanol responses require the *Drosophila* dopamine D1R1  
60 receptor in the respective target neurons of these two dopamine circuits, and that  
61 manipulations of either circuit can lead to reduction in voluntary alcohol consumption.

62

63

## 64 RESULTS

65 **Distinct dopamine neurons mediate opposing consummatory reactions to alcohol**

66 To determine the involvement of dopamine in alcohol-consumption behavior, we  
67 fed flies the dopamine precursor L-DOPA (L-3,4-dihydroxyphenylalanine), or 3-IY (3-  
68 iodo-tyrosine), an inhibitor of the rate-limiting dopamine synthesis enzyme tyrosine  
69 hydroxylase (TH, Fig. 1a). Flies with increased dopamine levels (Supplementary Figure  
70 1a) showed enhanced naïve aversion, while dopamine depletion (Supplementary Figure  
71 1a) led to naïve preference in an abbreviated 16-hour “2-bottle choice” CAFÉ assay (for  
72 capillary feeder, Fig. 1B<sup>5</sup>). As expected (see Fig. 1a), feeding of the TH product L-  
73 DOPA was able to restore the naïve alcohol preference caused by TH inhibition back to  
74 aversion (Supplementary Figure 1b). After a 20-min alcohol pre-exposure a day prior to  
75 testing, control flies developed experience-dependent preference for alcohol, whereas  
76 flies with increased dopamine levels did not (Fig. 1b). These results suggested that  
77 dopamine is crucial for alcohol aversion rather than acquired preference in flies. To  
78 confirm that levels of dopamine signaling correlated with alcohol aversion, we  
79 genetically altered DAN activity using a *TH-Gal4* driver, which is expressed in most  
80 DAN (Fig. 1c,<sup>6-9</sup>). Enhancing *TH-Gal4* DAN activity (using the heat-activated TrpA cation  
81 channel) during pre-exposure and during the CAFÉ assay preference test (Fig. 1d)  
82 caused alcohol aversion regardless of pre-exposure (Fig. 1e). Conversely, using a  
83 heat-activated dominant negative dynamin (*shi<sup>ts</sup>*) to silence these *TH-Gal4* DAN led to  
84 alcohol preference, regardless of pre-exposure (Fig. 1e). Therefore, changing the  
85 activity of the majority of DAN using *TH-Gal4* had the same effect as pharmacologically  
86 altering dopamine levels (Fig. 1b).

87 The PAM cluster (protocerebral anterior medial) of DAN expresses TH, but lacks  
88 *TH-Gal4* expression<sup>8,9</sup>. These PAM-DAN are required for appetitive olfactory

89 conditioning. We therefore wanted to know whether these PAM-DAN contributed to  
90 alcohol aversion, as indicated by our above pharmacological results, or whether they  
91 were involved in alcohol preference as suggested by their requirement for appetitive  
92 olfactory learning. When we activated the PAM-DAN subpopulation, using the heat-  
93 sensitive cation channel TrpA, flies showed enhanced experience-dependent alcohol-  
94 preference (Fig. 1f). Conversely, silencing these PAM-DAN using a dominant-negative  
95 dunamin, *sh<sup>1</sup><sup>ts</sup>*, abolished alcohol preference (Fig. 1f). These data suggested that *TH-*  
96 *Gal4* DAN mediate alcohol aversion, while PAM dopaminergic activity is required for  
97 experience-dependent alcohol preference. We confirmed the requirement for  
98 dopaminergic activity by knocking down the TH enzyme specifically in PAM-DAN (using  
99 *TH-RNAi*), which also abolished alcohol preference upon pre-exposure (Fig. 2b). This  
100 result also suggested that it is dopamine in these PAM neurons that is involved in  
101 experience-dependent alcohol preference rather than other putative co-transmitters.

102

### 103 **PAM dopamine neurons are required for the acquisition of experience-dependent** 104 **alcohol preference**

105 Because our behavioral paradigm consists of an alcohol pre-exposure followed  
106 by a test of flies' consumption preference a day later, we were able to ask whether  
107 PAM-DAN are required during the acquisition or the expression of alcohol preference.  
108 Limiting the heat-induced activation and silencing of the PAM-DAN to the alcohol pre-  
109 exposure or to the CAFÉ test revealed that these neurons had no effect during the  
110 testing (Fig. 2e). However, PAM-DAN activity was required during pre-exposure to  
111 acquire alcohol preference (Fig. 2d), and activating those neurons showed a trend

112 towards facilitated acquisition of preference (Fig. 2e,  $P = 0.056$ ). PAM-DAN project to  
113 the mushroom bodies (MB) a known center for associative learning in flies (Fig. 2a<sup>8,9</sup>).  
114 We therefore asked whether MB neurons are involved in experience-dependent alcohol  
115 preference, and, if so, when? Inhibiting activity of the  $\alpha/\beta$  and  $\gamma$  lobes of the MB during  
116 the pre-exposure abolished preference acquisition (Fig. 2f), while we found no effect of  
117 the MB  $\alpha/\beta$  and  $\gamma$  lobe neurons during the CAFÉ preference test (Fig. 2g). MB-  
118 projecting PAM-DAN activity is therefore required for the acquisition of alcohol  
119 preference, similar to the nucleus accumbens-projecting mammalian ventral tegmental  
120 area DAN<sup>2</sup>.

121

## 122 **A PPL1-to-fan-shaped body circuit mediates naïve alcohol aversion**

123 We next investigated the role of the *TH-Gal4* DAN population (Fig. 3a) in naïve  
124 alcohol aversion. Knocking down *TH* expression in these neurons resulted in naïve  
125 alcohol preference (Fig. 3b), suggesting that dopamine is the relevant neurotransmitter  
126 mediating naïve alcohol aversion. Activation or silencing of the *TH-Gal4* DAN during  
127 ethanol pre-exposure had no effect on alcohol preference (Fig. 3c), but activating them  
128 during the CAFÉ preference test enhanced naïve aversion and abolished experience-  
129 dependent preference (Fig. 3d). Together with the data from Fig. 1b, e, these results  
130 suggested that alcohol acutely induces aversion via *TH-Gal4* DAN during the CAFÉ  
131 preference choice. This could be mediated by alcohol odor and/or taste sensation, but  
132 in addition, *TH-Gal4* DAN might also be directly activated by alcohol's acute direct effect  
133 on these DAN.

134 We tested this latter hypothesis by performing *ex vivo* dopamine voltammetry  
135 experiments, while using the red light-activated CsChrimson cation channel<sup>10</sup>. Light-  
136 induced activation of *TH-Gal4* DAN caused robust release of dopamine from larval brain  
137 explants (Fig. 3e). Exposure to increasing amounts of alcohol revealed that even a low  
138 alcohol concentration of 5 mM potentiated the release of dopamine (Fig. 3e,f). This level  
139 is less than one third of the legal blood alcohol limit for driving. Acute direct exposure of  
140 *TH-Gal4* DAN to alcohol may therefore contribute to their activation, and underlie or  
141 potentiate acute sensory-induced aversion to alcohol at the behavioral level. Similarly,  
142 PAM-DAN might also be activated at these doses and thereby cause an appetitive  
143 reinforcing signal to the MB, ‘teaching the flies’ to like alcohol and override its aversive  
144 effects. This model would also explain how a sub-threshold ethanol pre-exposure could  
145 induce preference when paired with TrpA-mediated activation of PAM-DAN (Fig.2d,  
146 30/120 EtOH/air flow; below threshold to turn aversion into preference in control flies).

147 One of the *TH-Gal4* DAN clusters activated by aversive stimuli is PPL1  
148 (protocerebral posterior lateral 1)<sup>6</sup>, and these DAN might therefore also be involved in  
149 alcohol aversion. We thus followed up on other Gal4 drivers expressing in PPL1 to ask  
150 which of the *TH-Gal4* DAN are important in naïve, acute alcohol aversion. Using a  
151 number of Gal4 lines expressed in smaller subsets of *TH-Gal4* and PPL1 DAN  
152 (Supplementary Fig. 2)<sup>11,12</sup>, we found that silencing of both *TH-D'-Gal4* and *439B-Gal4*  
153 DAN caused naïve alcohol preference (Fig. 3g). *439B-Gal4* is expressed in 3 DAN per  
154 hemisphere (from the PPL1 DAN cluster, Fig. 3h), two projecting to the MB (Fig. 3i, red  
155 example), and one projecting to the dorsal fan-shaped body (dFSB; Fig. 3i, green). The  
156 two MB-projecting *439B-DAN* are also expressed in line *504B-Gal4*<sup>12</sup>, which had no



157 effect on acute alcohol aversion (Fig. 3g). This suggests that the dFSB-projecting 439B-  
158 DAN is involved in acute alcohol aversion. We further tested the involvement of dFSB in  
159 alcohol aversion by activating the PPL1-dFSB target neurons<sup>13</sup> and found that this also  
160 caused naïve alcohol preference (Fig. 3g). Interestingly, this PPL1-dFSB circuit is  
161 involved in arousal from sleep<sup>11,13</sup>. Note that flies with silenced PPL1-DAN, or activated  
162 dFSB neurons consumed the same total amount of food as did controls (Supplementary  
163 Fig. 3), arguing that these manipulations did not cause pervasive ‘sleepiness’ or  
164 inactivity (Supplementary Fig. 4).

165

### 166 **A Dopamine D1-like receptor is required in dopamine target neurons for alcohol** 167 **aversion and preference**

168 Together, the above data suggested that the PPL1-dFSB circuit mediates acute  
169 alcohol aversion, while the PAM-MB circuit participates in the acquisition of experience-  
170 dependent alcohol preference. To further strengthen our evidence for a critical role of  
171 dopamine in both these circuits, we investigated the involvement of two major dopamine  
172 receptors, D1 and D2. Pan-neuronal knock down (Fig. 4a) of the D1-like Dop1R1 (*D1R*)  
173 receptor led to naïve alcohol preference (Fig. 4d), while knock down of the D2-like  
174 receptor (*D2R*) did not affect naïve aversion or experience-dependent preference (Fig.  
175 4e). Furthermore, knock down of *D1R* in the dFSB was sufficient to cause naïve alcohol  
176 preference (Fig. 4g). MB-specific knock down revealed that *D1R* is required in MBs for  
177 experience-dependent preference (Fig. 4f).

178 To ascertain that our results were not caused by RNAi off-target effects, we also  
179 tested the *D1R*<sup>UAS</sup> mutation. These flies lack functional *D1R* expression, but the

180 presence of a Gal4-binding UAS site in the *D1R* gene allows expression to be restored  
181 by a Gal4 driver<sup>14</sup>. As with pan-neuronal RNAi knock down of *D1R* (Fig. 4d), *D1R*<sup>UAS</sup>  
182 flies showed naïve alcohol preference (Fig. 4h). When we conditionally restored adult  
183 *D1R* expression in neurons using an inducible pan-neuronal Gal4-driver (*elavGS+*), flies  
184 showed normal naïve alcohol aversion, which turned into experience-dependent  
185 preference upon pre-exposure (Fig. 4h). These data provide evidence for an acute  
186 requirement of dopamine signaling during adult behavior (as suggested by Figs. 2, 3)  
187 and argue against developmental defects causing the behavioral deficits<sup>15</sup>. When we  
188 restored MB-specific *D1R* expression in *D1R*<sup>UAS</sup> flies, we observed no change from the  
189 *D1R*<sup>UAS</sup> mutants, i.e., naïve preference with intact experience-dependent preference  
190 (Fig. 4i). Conversely, dFSB-specific *D1R* expression rescued *D1R*<sup>UAS</sup> naïve preference  
191 back to normal naïve avoidance, but these dFSB-rescued *D1R*<sup>UAS</sup> mutants did not  
192 acquire experience-dependent preference (Fig. 4i), presumably due to the lack of D1R  
193 in the MB. Indeed, when we restored D1R expression in both the MB and dFSB,  
194 *D1R*<sup>UAS</sup> flies displayed normal naïve alcohol aversion, followed by experience  
195 dependent preference upon alcohol pre-exposure (Fig. 4i). These data confirm that  
196 dopaminergic signaling from the PAM to the MB is required for acquired alcohol  
197 preference, and PPL1 dopaminergic signaling to the dFSB is required for naïve alcohol  
198 avoidance (Fig. 4j).

199

## 200 **DISCUSSION**

201 Here we demonstrate the multifaceted involvement of dopamine in voluntary  
202 alcohol consumption. We show that PAM dopamine neurons are required for the

203 acquisition of experience-dependent alcohol preference. Consummatory preference  
204 also requires the dopamine D1R1 receptor in the *Drosophila* MB. This PAM to MB  
205 circuit has previously been found to be important in the acquisition of appetitive sucrose  
206 learning<sup>8,9</sup>, while D1R1 is well known to be involved in *Drosophila* learning and  
207 memory<sup>16</sup>. Furthermore, the MB are involved in ethanol-reinforced odor preference<sup>4</sup>, as  
208 well as preferential alcohol consumption<sup>17</sup>. Our findings that acute alcohol exposure  
209 potentiates dopaminergic release suggest a mechanism of how an acute vapor  
210 exposure of ethanol might cause reinforcement: as alcohol rises in the brain,  
211 dopaminergic neurons, including reinforcing PAM neurons, get activated and impart an  
212 association of cues with behavioral reinforcement. These cues might involve the smell  
213 of alcohol itself, but this remains to be determined. Still, our data suggest that the  
214 *Drosophila* PAM neurons act analogously to the ‘classical’ mammalian dopamine  
215 neurons projecting from the ventral tegmental area to the nucleus accumbens, thought  
216 to be important in mediating the reinforcing actions of drug of abuse.

217 Our data also suggests that a single bilateral pair of PPL1 dopamine neurons  
218 mediates acute aversive effects of ethanol, and silencing these neurons causes  
219 abolished alcohol aversion. Dopaminergic neurons in the PPL1 cluster are acutely  
220 activated by a number of aversive stimuli<sup>6</sup>, consistent with their involvement in alcohol  
221 aversion. Thus in our acute choice paradigm, the smell<sup>18</sup>, or taste<sup>19,20</sup> of ethanol might  
222 activate these neurons and contribute to acute avoidance of alcohol consumption. In  
223 addition, acute drinking and alcohol’s pharmacodynamic potentiation of these neurons  
224 might also contribute to acute avoidance. Interestingly, the PPL1-dFSB circuit is

225 involved in arousal (from sleep)<sup>11,13</sup>, and our findings suggest that this circuit might be  
226 more broadly involved in the processing and salience of aversive cues.

227       Taken together, our data show that *Drosophila* dopamine neurons are required  
228 for both reinforcing and acute aversive reactions to alcohol. This is similar to recent  
229 findings in the mammalian brain, where dopaminergic neurons are involved in opposing  
230 reactions to drugs of abuse<sup>21,22</sup>. We show that alterations in either of these dopamine  
231 circuits can lead to a reduction in ethanol intake, emphasizing that acute sensitivity to  
232 the aversive aspects of a drug are protective against the development of addiction. This  
233 is in line with human genetic findings, where the strongest genetic factors that protect  
234 people from developing alcohol abuse disorders are alcohol dehydrogenase variants,  
235 which are involved in triggering acutely unpleasant reactions<sup>23</sup>. Furthermore, people  
236 perceiving alcohol as acutely more bitter tasting, are also less likely to develop  
237 alcoholism<sup>24,25</sup>. *Drosophila* thus show complex reactions to ethanol that are similar to  
238 humans. In addition, distinct *Drosophila* dopaminergic circuits mediate these diverse  
239 reactions. Thus, while the structural architecture of the fly brain is clearly different from  
240 that of mammals, key sub-circuits are conserved in their logic and in their multifaceted  
241 use of the same neurotransmitter—dopamine—which can mediate opposing behavioral  
242 outcomes, depending on the specific dopaminergic circuit engaged.

243

244

245

## 246 **MATERIALS AND METHODS**

### 247 **Fly husbandry and Genetics**

248 *Drosophila melanogaster* were raised in a 12:12 hr. Light/Dark cycle on a  
249 standard cornmeal/molasses diet at 25°C with 70% humidity, except for temperature  
250 sensitive experiments, which used 30°C during the experiments. The genetic  
251 background for all experiments used was *white\** *Berlin* (unless explicitly stated).  
252 Transgenic Gal4 driver lines containing different regions of the TH genomic locus (*TH-*  
253 *C<sup>1</sup>*, *D<sup>1</sup>*, *D4*, *F2*, and *C1-Gal4*) were obtained from Dr. Mark Wu (John's Hopkins).  
254 PPL1 specific-Gal4 lines were obtained from Dr. Karla Kaun (Brown University). Other  
255 transgenic lines were obtained from the Bloomington stock center.

256

### 257 **Drug feeding protocols**

258 Pharmacological treatment with 3-iodo tyrosine (3IY, Sigma) and L-DOPA  
259 (Sigma) were carried out as previously described<sup>26</sup>. 3IY (10mg/ml) or L-Dopa (1mg/ml)  
260 were dissolved in solutions containing 250 mM sucrose. Flies were pre-fed in a modified  
261 CAFÉ assay in rectangular 4-well plates (128 x 85.5 mm, Thermo Scientific; Fig. 5).  
262 Food was provided in 0.2 ml tubes with a 27 G needle hole at the bottom for drinking  
263 access, a 27 G hole atop for pressure equilibration and a 25 G hole atop for filling with  
264 solution. Flies were fed 3IY for a period of 48-hours and L-DOPA for 24-hours in the  
265 modified CAFÉ apparatus. For the *elav-GeneSwitch* Gal4 experiments, food-deprived  
266 flies were fed with 0.5 mM mifepristone (RU486) for 3 hours prior to pretreatment to  
267 ethanol.

268

### 269 **Booz-o-mat exposure**

270 Exposure paradigms used are as previously described<sup>3</sup>. The day before ethanol  
271 vapor exposure, male flies were collected in groups of 30 and put on un-yeasted food.  
272 The following day, flies were transferred into the Booz-o-mat apparatus for a 20- minute  
273 exposure at desired ethanol to air ratio (E/A) as described<sup>27</sup>. For temperature-sensitive  
274 experiments, *UAS-shi<sup>ts</sup>*, *UAS-TrpA<sup>ts</sup>*, and control flies were allowed to acclimate at 30°C  
275 for 20 min in the Booze-o-mat before starting the 20-min exposure at 30°C. Flies were  
276 then transferred to vials and placed into a 25°C/70% humidity incubator for a 24-hour  
277 recovery period.

278

### 279 **Capillary Feeder (Café) assay**

280 24 hr after ethanol pre-exposure, 15 flies were placed into each well of the Café  
281 assay apparatus as described<sup>28</sup>. Preference testing was carried out for 16-hours.

282

### 283 **Immunohistochemistry**

284 Immunohistochemistry was performed as previously described<sup>29</sup>. To visualize  
285 *439B-PPL1-GAL4* expression in the brain, a *pJFRC225-5xUAS-IVS-myr::smGFP-FLAG*  
286 (*smGFP-FLAG*) reporter probe<sup>30</sup> was utilized. The smGFP-FLAG transgene was  
287 visualized with an anti-FLAG antibody. The presynaptic marker mouse anti-nc82  
288 antibody was used to label general neuropil/brain structure. The multicolor Flip-out  
289 approach<sup>31</sup> was used for stochastic labeling of 439B-PPL1 neurons.

290

### 291 **Light-induced stimulation of DA neurons and fast-scan voltammetry**

292 All chemicals were purchased from Sigma-Aldrich (St. Louis, MO) and all

293 solutions were made with Milli-Q water (Millipore, Billerica, MA). Dissections, recordings,  
294 and calibrations were performed in a simple buffer solution (131.3 mM NaCl, 3.0 mM  
295 KCl, 10 mM NaH<sub>2</sub>PO<sub>4</sub> monohydrate, 1.2 mM MgCl<sub>2</sub> hexahydrate, 2.0 mM Na<sub>2</sub>SO<sub>4</sub>  
296 anhydrous, 1.2 CaCl<sub>2</sub> dihydrate, 11.1 mM glucose, 5.3 mM trehalose, pH = 7.4). Carbon  
297 fiber microelectrodes were fabricated from T-650 carbon fibers (a gift of Cytec  
298 Engineering Materials, West Patterson, NJ) and were used for fast-scan cyclic  
299 voltammetry as previously described<sup>32</sup>. Virgin females with *UAS-CsChrimson* (a  
300 chimera of CsChR and Chrimson) inserted in *attp18*<sup>33</sup> (a gift of Vivek Jayaraman) were  
301 crossed with *TH-GAL4* (a gift of Jay Hirsh). Resulting heterozygous larvae were  
302 shielded from light and raised on standard cornmeal food mixed 250:1 with 100 mM all-  
303 trans-retinal. A small amount of moistened Red Star yeast (Red Star, Milwaukee, WI)  
304 was placed on top of the food to promote egg laying.

305 For the protocerebrum recordings, brains were isolated into dissection buffer  
306 from larvae using forceps under a dissection microscope, and the electrode was  
307 implanted from the lateral edge of the tissue into the dorsal medial protocerebrum. The  
308 electrode equilibrated in the tissue for 10 minutes prior to data collection and a baseline  
309 recording was taken for 10 seconds prior to stimulation. Red light estimated at 0.75 mW  
310 from a 617 nm fiber-coupled high-power LED with a 200 μm core optical cable  
311 (ThorLabs, Newton, NJ) was used to stimulate the CsChrimson ion channel. The  
312 TarHeel CV software (a gift of Mark Wightman) was used to control the light stimulation  
313 and to record the current from the applied voltage. After taking a baseline 2 second  
314 stimulation, 5 mM ethanol (10% in buffer) was added to the solution of fly buffer and  
315 then another stimulation was recorded after 5 minutes. The concentration of ethanol

316 was increased to 15 mM and then to 45 mM. Stimulations were performed at each  
317 concentration five minutes after the ethanol was added to allow for equilibration. Adding  
318 increasing amounts of dissection buffer instead of ethanol was performed as a vehicle  
319 control. Data are presented at mean +/- standard error of the mean (SEM) and graph  
320 error bars are SEM.

321

### 322 **HPLC measurement of brain dopamine levels**

323 Flies were immobilized on ice (5/sample). Brains were dissected and  
324 homogenized in ice-cold 0.02 M HClO<sub>4</sub> and 0.00025 M ascorbate solution using a  
325 Kontes micro tissue grinder. Homogenate was centrifuged at 13,000 rpm for 5 min at  
326 4°C. The supernatant was collected and centrifuged at 13,000 rpm for 30 sec at 4°C  
327 using a 0.22 µm Ultrafree PVDF filter (MilliporeSigma, Billerica, MA). Samples (approx.  
328 25 µL final volume) were stored at -80°C until analysis. The HPLC-ECD system  
329 consisted of a Luna 3 µm C18 (2) 100 Å, 50 x 1 mm, LC column (Phenomenex,  
330 Torrance, CA) and SenCell2 electrochemical cell at +450 mV (Antec Leyden,  
331 Netherlands) with Ag/AgCl reference electrode. Aqueous mobile phase with ion-pairing  
332 agents (0.50 g OSA, 0.05 g DSA, 0.13 g EDTA, 11.08 g NaH<sub>2</sub>PO<sub>4</sub>, 100-150 mL MeOH  
333 in 1L H<sub>2</sub>O; pH adjusted to 5.6) was delivered to the column using a LC110S piston  
334 pump (Antec Leyden, Netherlands). Column and electrochemical cell were kept at 35°C  
335 inside a controller (Intro model, GBC Separations, Hubbardson, MA) with a Rheodyne  
336 8125 manual injector. Analog responses from the electrochemical detector were  
337 digitized using an analog-to-digital converter (SS240x model, Scientific Software,  
338 Pleasanton, CA). EZ Chrome Elite software was used to collect chromatograms



339 (Scientific Software, Pleasanton, CA). Sample dopamine content was estimated via the  
340 calibration curve method using external dopamine standards prepared in 0.1 M H<sub>3</sub>PO<sub>4</sub>.  
341 Reported estimates are derived from chromatograms with signal-to-noise ratio  $\geq 3$  that  
342 met in-house quality criteria.

343

#### 344 **Statistics**

345 Statistical significance of results in this manuscript was established using  
346 analyses of variance (ANOVAs) tests with GraphPad Prism software for Mac. For the  
347 post-hoc analyses, Dunnett's test was applied to control for the multiple comparison  
348 when several groups were compared to the same control. Error bars in all experiments  
349 represent SEM. Significance was only attributed to experimental lines that were  
350 statistically different from their respective controls. Significance in all graphs shown are  
351 defined as \* $p < 0.05$ , \*\* $p < 0.01$ , and \*\*\* $p < 0.001$ .

352

#### 353 **ACKNOWLEDGEMENTS**

354

355 We thank Dante Gonzalez, Rachel Dove, Summer Acevedo and the rest of the  
356 Rothenfluh lab for their help and advice with experiments. We thank Mark Wu for  
357 numerous dopaminergic *Gal4* flies and Karla Kaun for the PPL1-Specific Gal4 lines.  
358 This work was supported by the NIH (T32 fellowship DA007290 and F31 AA021340 to  
359 SAO, T32 fellowship AA007471 to RUC, R37AA011852 to RAG, R01DK110358 to ARR  
360 and R01AA019526 to AR). AR was also supported by an Effie Marie Cain Scholarship  
361 in Biomedical Research from UT Southwestern, and by the University of Utah  
362 Neuroscience Initiative. ARR was also supported by the AHA (16CSA28530002). The

363 authors declare that they have no competing interests. A detailed description of all  
364 material and methods as well as supplementary figures are available as supporting  
365 online materials.

366

#### 367 **AUTHOR CONTRIBUTIONS**

368 S.A.O. and A.R. conceived the study. S.A.O., E.P.C., Y.N., D.W., R.A.G  
369 performed experiments and analyzed the data with the other authors. R.A.G., G.M.R.,  
370 B.J.V., A.R.R., A.R. procured funding. S.A.O. , A.R.B., C.B.M., A.R.R., and A.R. wrote  
371 the paper with input from the other authors.

372

#### 373 **COMPETING INTERESTS**

374 The authors declare no competing financial interests.

375

376 **References**

- 377
- 378 1. King, A. C., McNamara, P. J., Hasin, D. S. & Cao, D. Alcohol challenge responses predict  
379 future alcohol use disorder symptoms: a 6-year prospective study. *Biol Psychiatry* **75**, 798–806  
380 (2014).
- 381 2. Koob, G. F. & Volkow, N. D. Neurobiology of addiction: a neurocircuitry analysis. *Lancet*  
382 *Psychiatry* **3**, 760–773 (2016).
- 383 3. Peru y Colon de Portugal, R. L. *et al.* Long-lasting, experience-dependent alcohol  
384 preference in *Drosophila*. *Addict Biol* **19**, 392–401 (2014).
- 385 4. Kaun, K. R., Azanchi, R., Maung, Z., Hirsh, J. & Heberlein, U. A *Drosophila* model for  
386 alcohol reward. *Nat Neurosci* **14**, 612–619 (2011).
- 387 5. Gonzalez, D. A. *et al.* The Arf6 activator Efa6/PSD3 confers regional specificity and  
388 modulates ethanol consumption in *Drosophila* and humans. *Mol. Psychiatry* **23**, 621–628 (2018).
- 389 6. Mao, Z. & Davis, R. L. Eight different types of dopaminergic neurons innervate the  
390 *Drosophila* mushroom body neuropil: anatomical and physiological heterogeneity. *Front Neural*  
391 *Circuits* **3**, 5 (2009).
- 392 7. Friggi-Grelin, F. *et al.* Targeted gene expression in *Drosophila* dopaminergic cells using  
393 regulatory sequences from tyrosine hydroxylase. *J Neurobiol* **54**, 618–627 (2003).
- 394 8. Burke, C. J. *et al.* Layered reward signalling through octopamine and dopamine in  
395 *Drosophila*. *Nature* **492**, 433–437 (2012).
- 396 9. Liu, C. *et al.* A subset of dopamine neurons signals reward for odour memory in  
397 *Drosophila*. *Nature* **488**, 512–516 (2012).
- 398 10. Klapoetke, N. C. *et al.* Independent optical excitation of distinct neural populations. *Nat*  
399 *Meth* **11**, 338–346 (2014).
- 400 11. Liu, Q., Liu, S., Kodama, L., Driscoll, M. R. & Wu, M. N. Two dopaminergic neurons  
401 signal to the dorsal fan-shaped body to promote wakefulness in *Drosophila*. *Curr Biol* **22**, 2114–  
402 2123 (2012).
- 403 12. Aso, Y. *et al.* The neuronal architecture of the mushroom body provides a logic for  
404 associative learning. *Elife* **3**, e04577 (2014).

- 405 13. Pimentel, D. *et al.* Operation of a homeostatic sleep switch. *Nature* **536**, 333–337 (2016).
- 406 14. Kong, E. C. *et al.* A pair of dopamine neurons target the D1-like dopamine receptor DopR  
407 in the central complex to promote ethanol-stimulated locomotion in *Drosophila*. *PLoS ONE* **5**,  
408 e9954 (2010).
- 409 15. Ferguson, L. *et al.* Transient Dysregulation of Dopamine Signaling in a Developing  
410 *Drosophila* Arousal Circuit Permanently Impairs Behavioral Responsiveness in Adults. *Front*  
411 *Psychiatry* **8**, 22 (2017).
- 412 16. Kim, Y.-C., Lee, H.-G. & Han, K.-A. D1 dopamine receptor dDA1 is required in the  
413 mushroom body neurons for aversive and appetitive learning in *Drosophila*. *J Neurosci* **27**,  
414 7640–7647 (2007).
- 415 17. Xu, S. *et al.* The propensity for consuming ethanol in *Drosophila* requires rutabaga  
416 adenylyl cyclase expression within mushroom body neurons. *Genes Brain Behav* **11**, 727–739  
417 (2012).
- 418 18. Rodrigues, V. Olfactory behavior of *Drosophila melanogaster*. *Basic Life Sci.* **16**, 361–371  
419 (1980).
- 420 19. Devineni, A. V. & Heberlein, U. Preferential Ethanol Consumption in *Drosophila* Models  
421 Features of Addiction. *Current Biology* **19**, 2126–2132 (2009).
- 422 20. Pohl, J. B. *et al.* Ethanol Preference in *Drosophila melanogaster* is Driven by Its Caloric  
423 Value. *Alcohol Clin Exp Res* **36**, 1902–1912 (2012).
- 424 21. Lammel, S. *et al.* Input-specific control of reward and aversion in the ventral tegmental  
425 area. *Nature* **491**, 212–217 (2012).
- 426 22. Juarez, B. & Han, M.-H. Diversity of Dopaminergic Neural Circuits in Response to Drug  
427 Exposure. *Neuropsychopharmacology* **41**, 2424–2446 (2016).
- 428 23. Edenberg, H. J. The genetics of alcohol metabolism: role of alcohol dehydrogenase and  
429 aldehyde dehydrogenase variants. *Alcohol Res Health* **30**, 5–13 (2007).
- 430 24. Duffy, V. B., Peterson, J. M. & Bartoshuk, L. M. Associations between taste genetics, oral  
431 sensation and alcohol intake. *Physiol Behav* **82**, 435–445 (2004).
- 432 25. Hinrichs, A. L. *et al.* Functional variant in a bitter-taste receptor (hTAS2R16) influences  
433 risk of alcohol dependence. *Am J Hum Genet* **78**, 103–111 (2006).
- 434 26. Bainton, R. J. *et al.* Dopamine modulates acute responses to cocaine, nicotine and ethanol

- 435 in *Drosophila*. *Curr Biol* **10**, 187–194 (2000).
- 436 27. Wolf, F. W., Rodan, A. R., Tsai, L. T.-Y. & Heberlein, U. High-resolution analysis of  
437 ethanol-induced locomotor stimulation in *Drosophila*. *J Neurosci* **22**, 11035–11044 (2002).
- 438 28. Gonzalez, D. A. *et al.* The Arf6 activator Efa6/PSD3 confers regional specificity and  
439 modulates ethanol consumption in *Drosophila* and humans. *Mol. Psychiatry* **22**, 11035 (2017).
- 440 29. Wu, J. S. & Luo, L. A protocol for dissecting *Drosophila melanogaster* brains for live  
441 imaging or immunostaining. *Nat Protoc* **1**, 2110–2115 (2006).
- 442 30. Viswanathan, S. *et al.* High-performance probes for light and electron microscopy. *Nat Meth*  
443 **12**, 568–576 (2015).
- 444 31. Nern, A., Pfeiffer, B. D. & Rubin, G. M. Optimized tools for multicolor stochastic labeling  
445 reveal diverse stereotyped cell arrangements in the fly visual system. *Proc. Natl. Acad. Sci. U.S.A.*  
446 **112**, E2967–76 (2015).
- 447 32. Xiao, N., Privman, E. & Venton, B. J. Optogenetic control of serotonin and dopamine  
448 release in *Drosophila* larvae. *ACS Chem Neurosci* **5**, 666–673 (2014).
- 449 33. Klapoetke, N. C. *et al.* Independent optical excitation of distinct neural populations. *Nat*  
450 *Meth* **11**, 338–346 (2014).
- 451

452 **FIGURES**

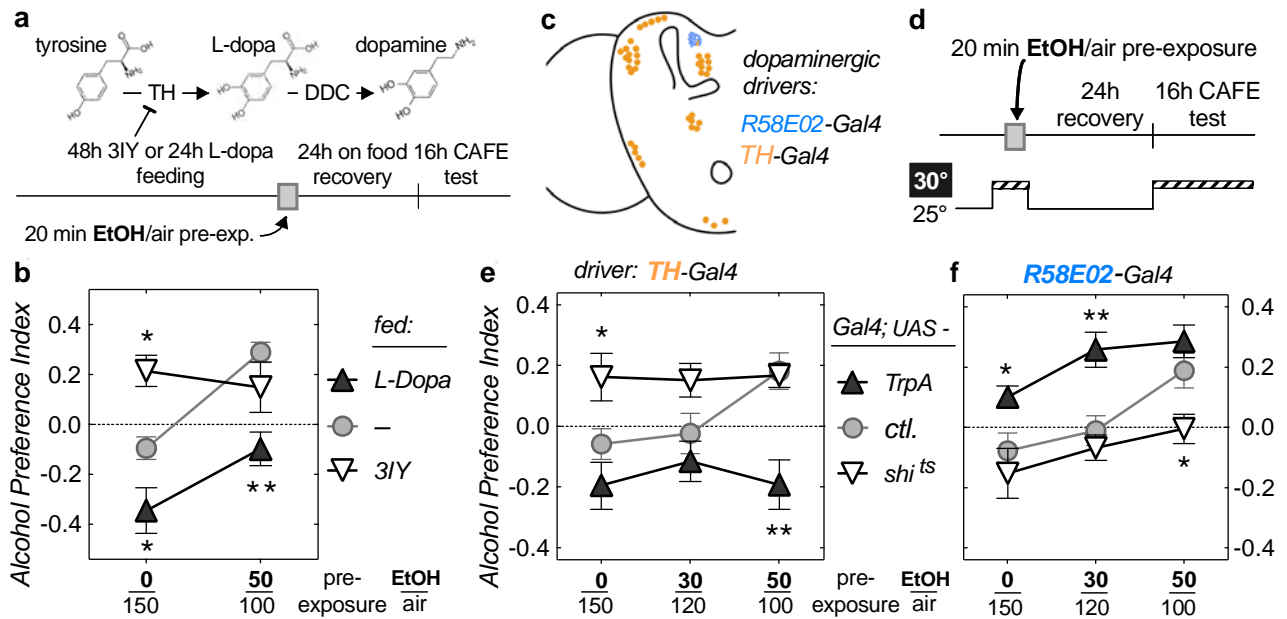

453  
454  
455 **Fig. 1. Distinct dopamine neurons are required for naïve avoidance and experience-**  
456 **dependent alcohol preference.** (a) Experimental paradigm describing drug feeding followed by  
457 alcohol-induced consumption preference assay (CAFÉ stands for capillary feeder). (b) Naïve  
458 control flies (0/150 alcohol/air flow mock pre-exposure, fed plain food: – grey) show slight aversion  
459 to alcohol (Preference Index < 0); naïve flies with increased dopamine levels (fed L-DOPA: black)  
460 show enhanced aversion; flies with reduced dopamine levels (fed 3IY: white) show naïve  
461 preference. Alcohol pre-exposure (to 50/100 alcohol/air flow for 20 min the day before) induces  
462 preference in control flies, but not in L-DOPA-fed flies (\*\* $P < 0.01$ , \* $P < 0.05$ , two-way ANOVA with  
463 Dunnett's post-hoc comparisons vs. – control). (c) Schematic indicating cell bodies of dopamine  
464 neurons in the fly brain and the two dopaminergic drivers used in e,f. (d) Experimental paradigm,  
465 where 30° C is the effective temperature causing silencing (*shi<sup>ts</sup>*), or activation (*TrpA*) of neurons.  
466 (e) Silencing *TH-Gal4* dopamine neurons (white) causes naïve preference, and activating them  
467 (black) suppresses experience-dependent preference, similar to the pharmacological intervention in  
468 **b** (\*\* $P < 0.01$ , \* $P < 0.05$ ; here, and in following Figures *ctl.* are *UAS-GFP* flies). (f) Conversely,  
469 activating PAM dopamine neurons (*R58E02-Gal4* driver, black) facilitates experience-dependent  
470 preference, while silencing these neurons (white) prevents preference acquisition (\*\* $P < 0.01$ , \* $P <$   
471 0.05).

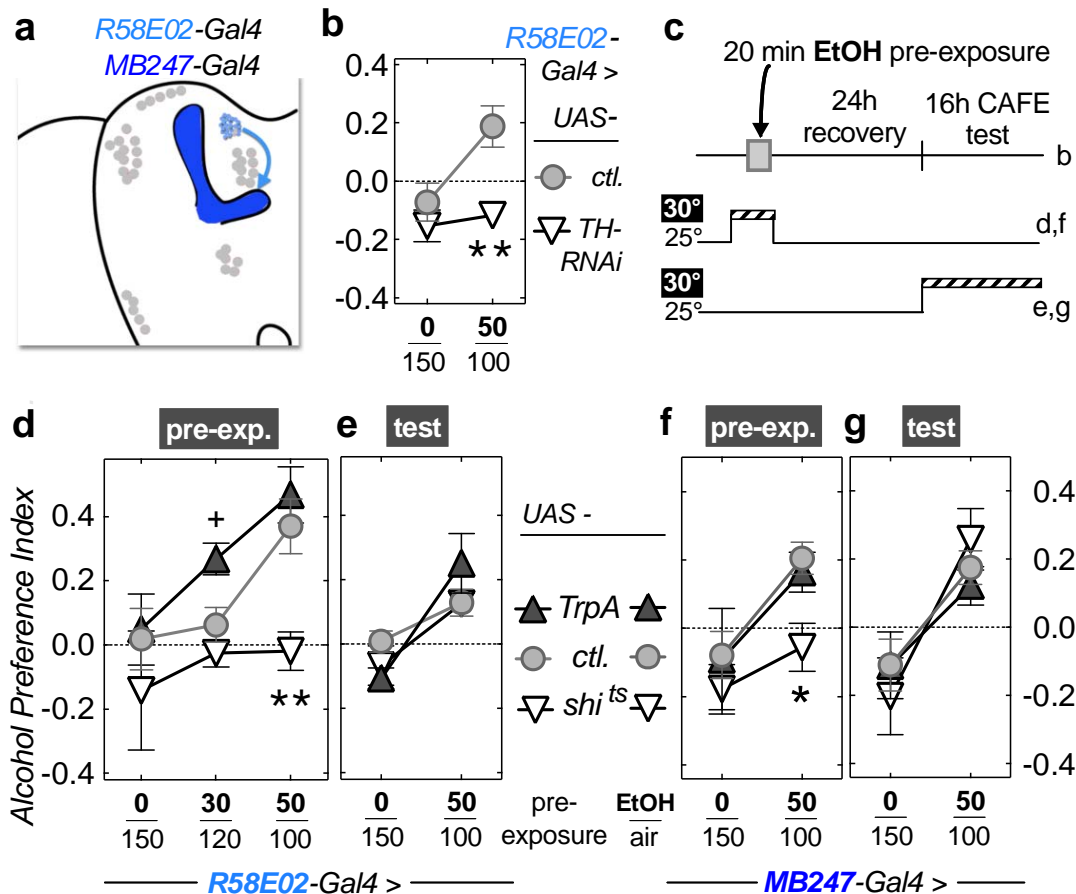

472

473 **Figure 2: PAM dopamine neurons innervating the mushroom bodies are required for the**  
 474 **acquisition of experience-dependent alcohol preference.** (a) Fly brain schematic indicating the  
 475 two drivers used. The mushroom body is indicated by dark blue. (b) RNAi-mediated knockdown of  
 476 TH (*UAS-TH-RNAi*) in *PAM-Gal4* dopamine neurons (white) prevents experience-dependent  
 477 alcohol preference (\*\* $P < 0.01$ ). (c) Experimental paradigm used in d-g. (d,e) Silencing *PAM-Gal4*  
 478 dopamine neurons with *UAS-shi<sup>ts</sup>* during pre-exposure (d, white), but not during testing (e) leads to  
 479 loss of experience-dependent ethanol preference (\*\* $P < 0.01$ ). Activating PAM neurons during pre-  
 480 exposure with *UAS-TrpA* (d, black) also shows a trend for facilitation of preference acquisition ( $^+P =$   
 481 0.056). (f,g) Similar to PAM neurons, silencing the target mushroom body neurons (*MB247-Gal4*  
 482 driver) with *UAS-shi<sup>ts</sup>* during pre-exposure (f, white), but not during testing (g) also prevented  
 483 formation of experience-dependent alcohol preference ( $^*P < 0.05$ ).



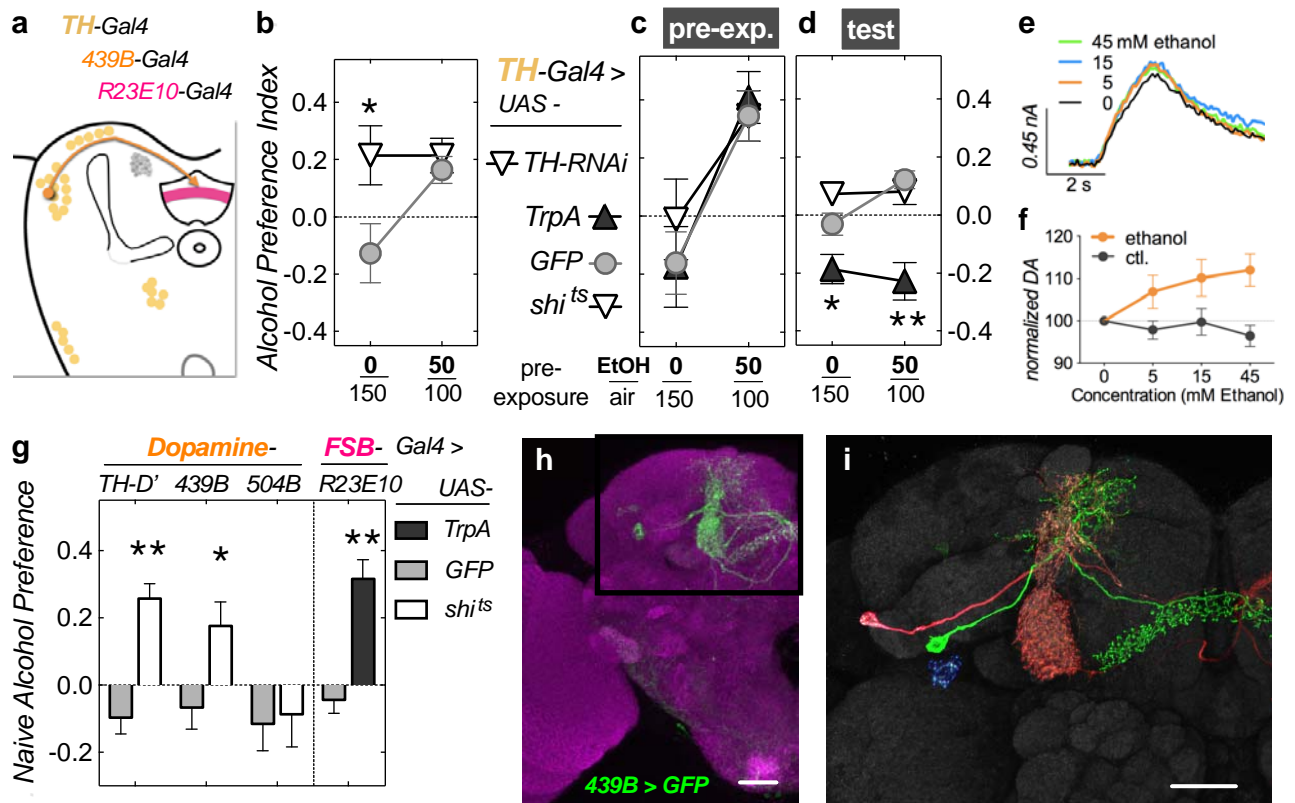

484  
 485 **Figure 3: PPL1 dopamine neurons projecting to the fan-shaped body mediate acute naïve**  
 486 **alcohol avoidance.** (a) Schematic highlighting dopamine cells (*TH*-, *439B-Gal4*) and their target,  
 487 the fan-shaped body (*R23E10-Gal4*). (b) Knockdown of TH (*UAS-TH-RNAi*, white) in *TH-Gal4*  
 488 neurons leads to naïve preference ( $*P < 0.05$ ). (c) Activating or silencing *TH-Gal4* dopamine  
 489 neurons during ethanol pre-exposure does not affect preference, while activating them during the  
 490 test (d) increases alcohol avoidance, regardless of pre-exposure. (e) Representative voltammetry  
 491 traces from a larval brain and (f) total dopamine released upon stimulation of *TH-Gal4* neurons  
 492 (with red light, via *UAS-CsChrimson*) shows that even low levels (5 mM) of acute ethanol potentiate  
 493 dopamine release. Dopamine was measured from the median protocerebrum, close to the fan-  
 494 shaped body. (g) A subset of *TH-Gal4* dopamine neurons affects naïve alcohol avoidance when  
 495 silenced during naïve preference testing ( $**P < 0.01$ ,  $*P < 0.05$ ), including *TH-D'-Gal4*, which  
 496 expressed in the PPL1 cluster, and *439B-Gal4*, which expresses in three PPL1 dopamine neurons  
 497 (h). (i) Higher magnification picture of two (pseudocolored) *439B-Gal4* neurons. Two dopamine  
 498 neurons PPL1- $\gamma 2\alpha'1$  (red) and PPL1- $\alpha'2\alpha 2$  (cell body not visible in this picture) project to the  
 499 mushroom bodies, and are also contained in the *504B-Gal4* driver, which does not affect naïve  
 500 alcohol avoidance (see g). The green dopamine neuron (PPL1-dFSB) projects to the dorsal FSB,  
 501 but not the MB. Activating layer 6 dFSB neurons (*R23E10-Gal4* driver) leads to naïve alcohol  
 502 preference (see g).



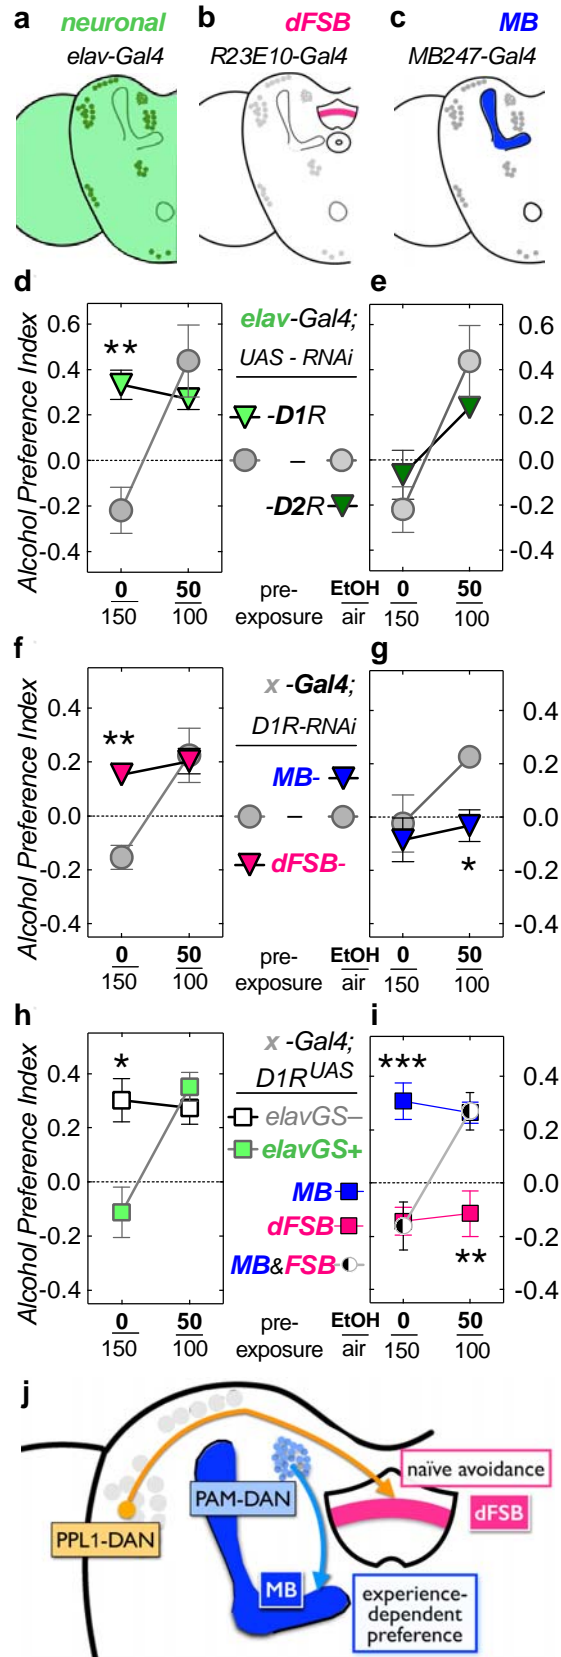

504 **Figure 4. The dopamine D1R1 receptor is required in the mushroom bodies for experience-**  
505 **dependent alcohol preference and in the fan-shaped body for naïve avoidance. (a-c)** Fly brain  
506 schematics showing Gal-4 drivers used expressing in all neurons (a), dorsal fan-shaped body layer  
507 6 (dFSB, b), and mushroom bodies (MB, c). (d) Pan-neuronal, RNAi-mediated knockdown of  
508 dopamine D1R1 receptor (*D1R*), but not D2 receptor (*D2R*, e) abolishes naïve alcohol avoidance  
509 (\*\**P* < 0.01). (f,g) D1R knockdown in the dFSB also abolishes naïve alcohol avoidance (\*\**P* < 0.01,  
510 magenta in f), whereas, D1R knockdown in the MB abolishes experience-dependent preference  
511 (\*\**P* < 0.05, blue in g). (h,i) *D1R<sup>UAS</sup>* flies are mutants that lack *D1R* expression, but this can be  
512 restored by the introduction of a Gal4-driver . Together with an RU486-inducible pan-neuronal Gal4  
513 driver (*elavGS*, for RU486-Gene-Switch), these *D1R<sup>UAS</sup>* mutants show naïve alcohol preference  
514 when Gal4 is not induced (*elavGS*–, white in h). This is rescued when adult flies are fed RU486  
515 before the ethanol-pre-exposure and D1R expression is restored (*elavGS*+, green in h). When *D1R*  
516 expression is restored in the MB, *D1R<sup>UAS</sup>* flies still show naïve alcohol preference (*MB247-*  
517 *Gal4>D1R<sup>UAS</sup>*, blue in i). Conversely, restoring *D1R* expression in the FSB only rescues naïve  
518 alcohol avoidance, but now reveals a loss of experience-dependent preference (*R23E10-*  
519 *Gal4>D1R<sup>UAS</sup>*, magenta in i), presumably due to lack of *D1R* in the MB. Indeed, when *D1R*  
520 expression is restored in both the MB and the FSB, *D1R<sup>UAS</sup>* mutants show normal naïve alcohol  
521 avoidance succeeded by preference upon an alcohol pre-exposure (*MB247-Gal4;R23E10-*  
522 *Gal4>D1R<sup>UAS</sup>*, black and white in i). (j) Schematic highlighting the two dopamine circuits involved in  
523 naïve alcohol avoidance (PPL1–dFSB) and the acquisition of experience-dependent alcohol  
524 preference (PAM–MB).  
525

526 **Supplementary Materials:**

527 **Figures S1-4**

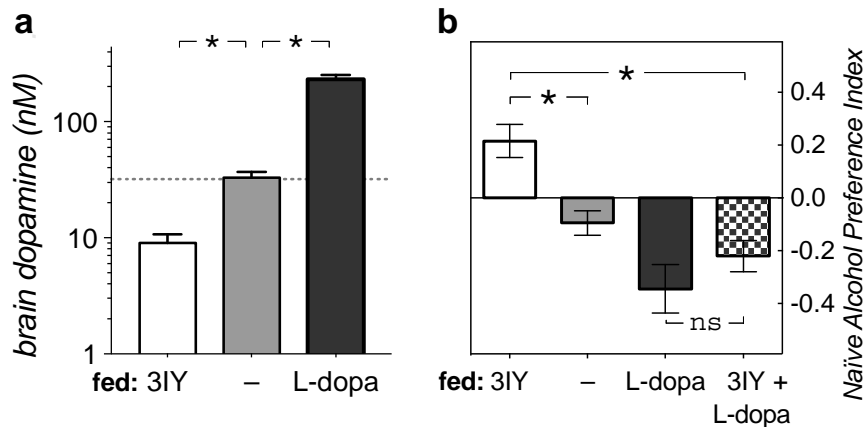

528

529 **Supplementary Figure 1. Dopamine pharmacology.** (a) Brain dopamine concentrations in  
 530 pooled fly brain homogenates after drug feeding, as measured by HPLC-ECD ( $*P < 0.05$ ,  $n = 3$   
 531 replicates of 5 brains homogenized). (b) Simultaneous feeding of 3IY and L-dopa converts 3IY-  
 532 induced naïve preference back to naïve avoidance. (Data as in main Fig. 1B, with the addition of  
 533 the co-feeding, checkered;  $*P < 0.05$  one-way ANOVA with Dunnett's post-hoc comparison).

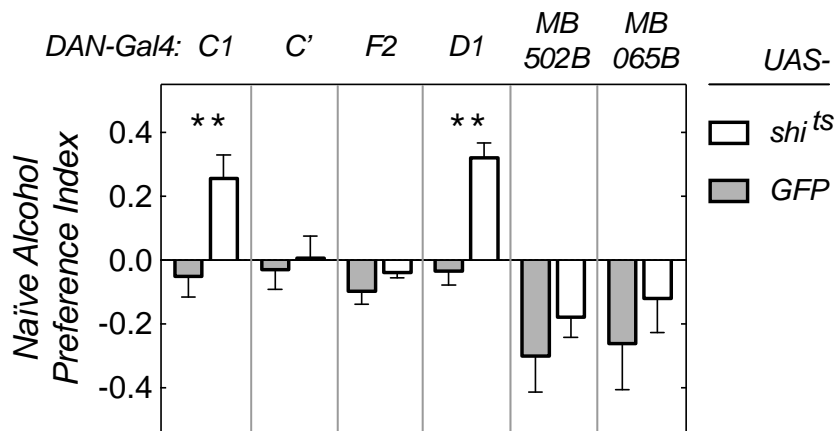

534

535 **Supplementary Figure 2. Silencing of different DAN causes naïve alcohol aversion.** 2 of 6  
 536 transgenic *DAN-Gal4* driver lines (in addition to the ones shown in Fig. 3g) caused naïve  
 537 preference to alcohol when silenced with *UAS-shi<sup>ts</sup>* compared to their respective *UAS-GFP*  
 538 controls ( $*P < 0.05$ , one-way ANOVA with Bonferroni correction,  $n = 6-12$ ).

539

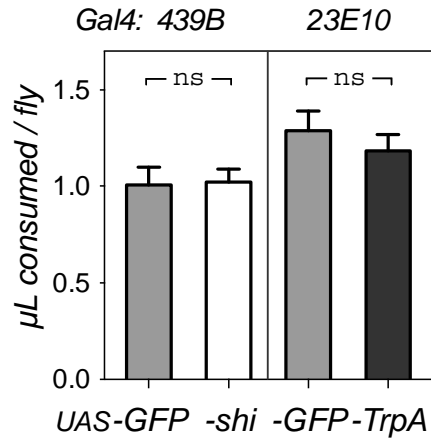

540  
541 **Supplemental Figure 3. Naïve alcohol preference caused by manipulation of the PPL1-**  
542 **dFSB circuit does not alter total food consumption.** Total food consumption (sucrose +  
543 sucrose/ethanol mixture) per fly is indicated over the 16-hour CAFÉ test. No significant  
544 differences were observed between experimentals and controls (grey). This was true for other  
545 DAN-Gal4 lines affecting naïve alcohol aversion too (data not shown).  
546

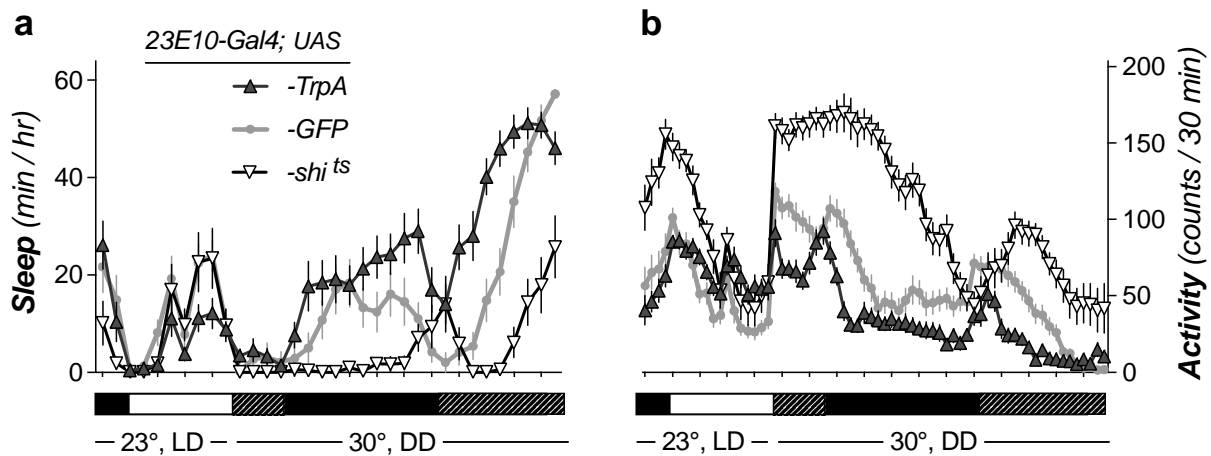

547  
548  
549 **Supplemental Figure 4. Sleep induction by activation of dFSB.** (a) Shifting *23E10-Gal4;*  
550 *UAS-TrpA* to 30°C (black) caused an increase in total sleep duration, but did not just put the  
551 flies to sleep: considerable levels of activity remained (b). Note that this is the same  
552 temperature and light regimen as used for the CAFÉ preference test.

553  
554
